# Supplementary material for: Rs12976445 polymorphism is associated with the risk of post-SAH re-bleeding by modulating the expression of microRNA-125 and ET-1
Source: PubMed Central journal article supplement (PMC8825803; doi:10.1038/s41598-021-04330-4), 2022-02-08

**Rs12976445 polymorphism is associated with the risk of post-SAH re-bleeding by modulating the expression of microRNA-125 and ET-1**

Wenping Xiong<sup>1</sup>, Weiqi Yao<sup>1</sup>, Zeyuan Gao<sup>1</sup>, Kui Liu<sup>1\*</sup>

1. Department of Neurosurgery, Zhongnan Hospital of Wuhan University, Wuhan, China, 430071
2. Department of Hematology, Union Hospital, Huazhong University of Science and Technology; Hubei Engineering Research Center for Human Stem Cell Preparation and Application and Resource Conservation, Wuhan, China, 430022

Correspondence to: Kui Liu, Department of Neurosurgery, Zhongnan Hospital of Wuhan University, No.169 Donghu Road, Wuhan, China, 430071

Email: neurondrx@163.com

**Western Blots**

Original Image for Fig 5 ET1

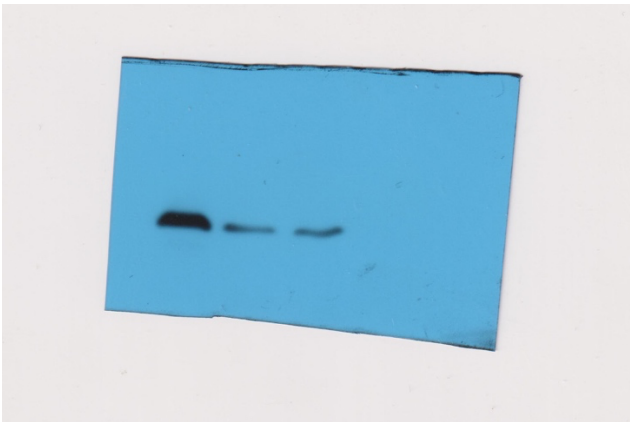

Original Image for Fig 5 beta actin

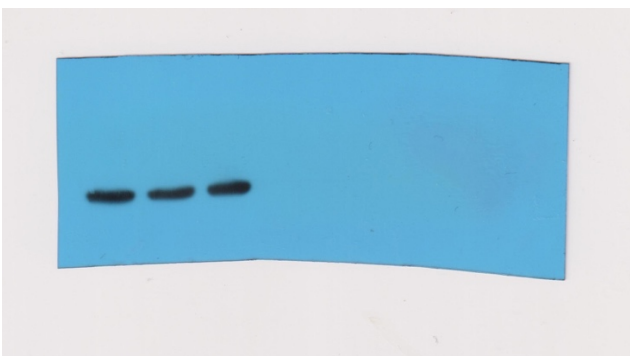

Original Image for Fig 6 ET1

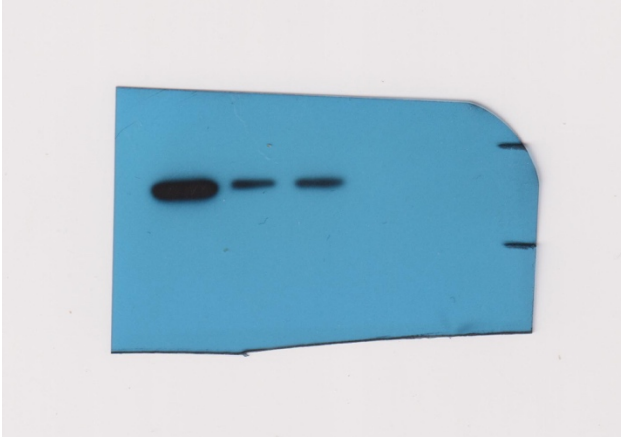

Original Image for Fig 6 beta actin

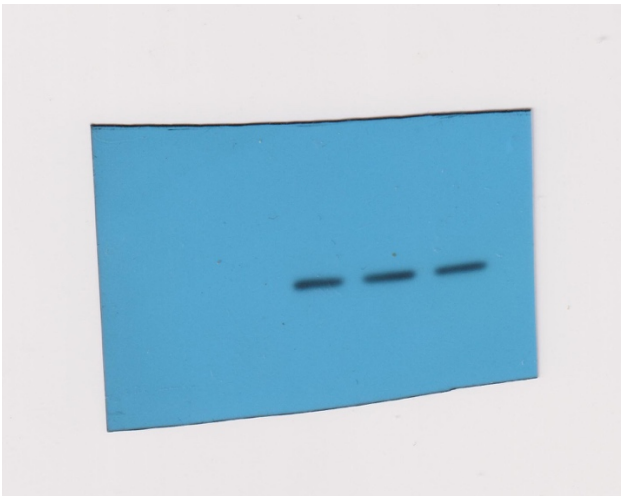

Supplement: 41598_2021_4330_MOESM1_ESM.pdf [file 41598_2021_4330_MOESM1_ESM.pdf]
